# Supplementary material
Source: MDPI journal article supplement (https://www.mdpi.com/2073-4395/10/5/735)
Supplement: s1 [file s1]

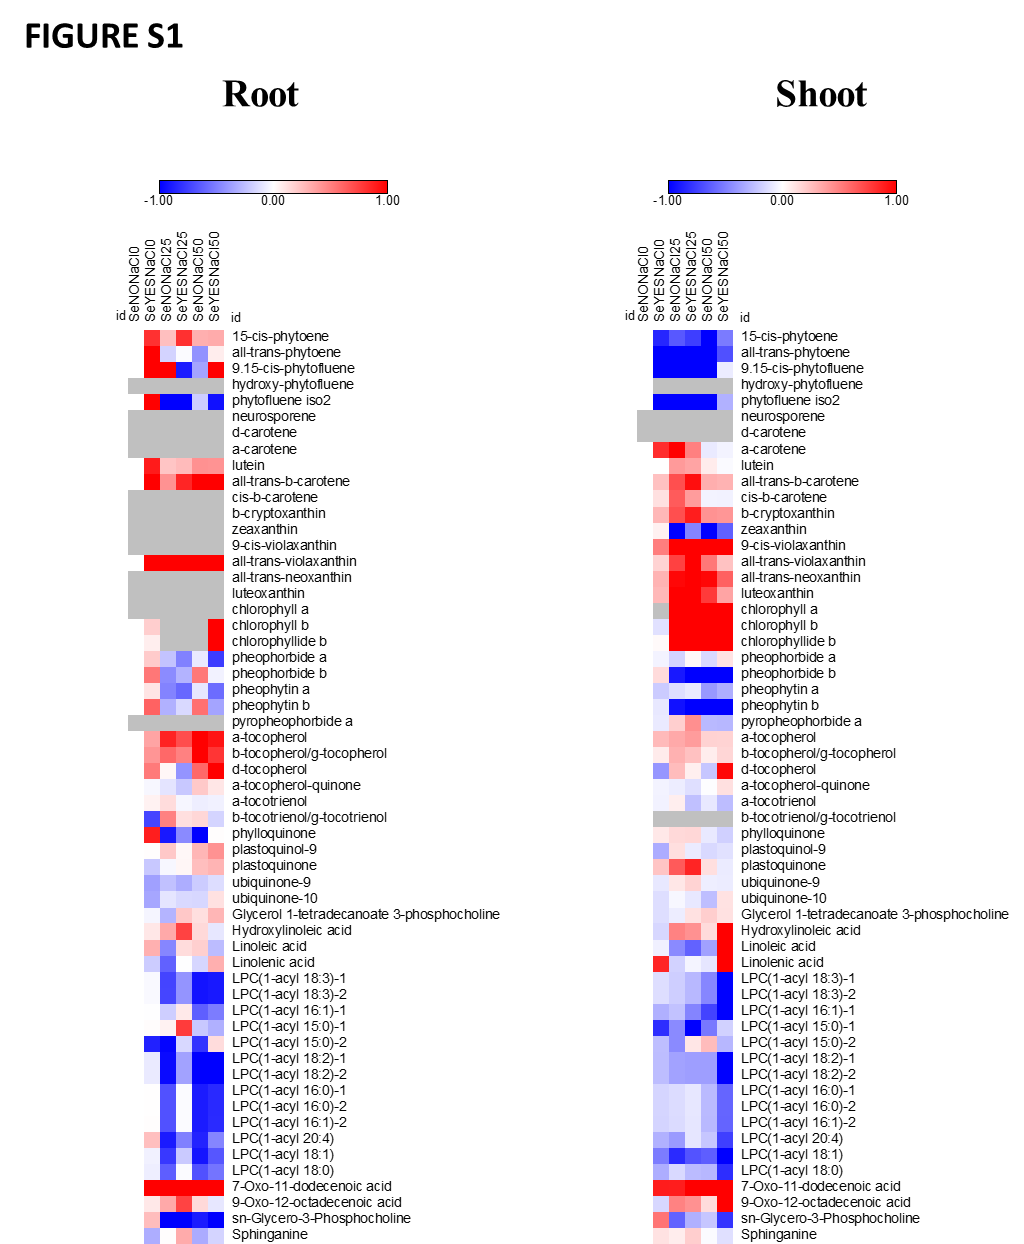


**Figure S1:** Heatmap visualization of non-polar metabolomes. Data are reported as log2 fold with respect to SeNONaCl0 treatment.


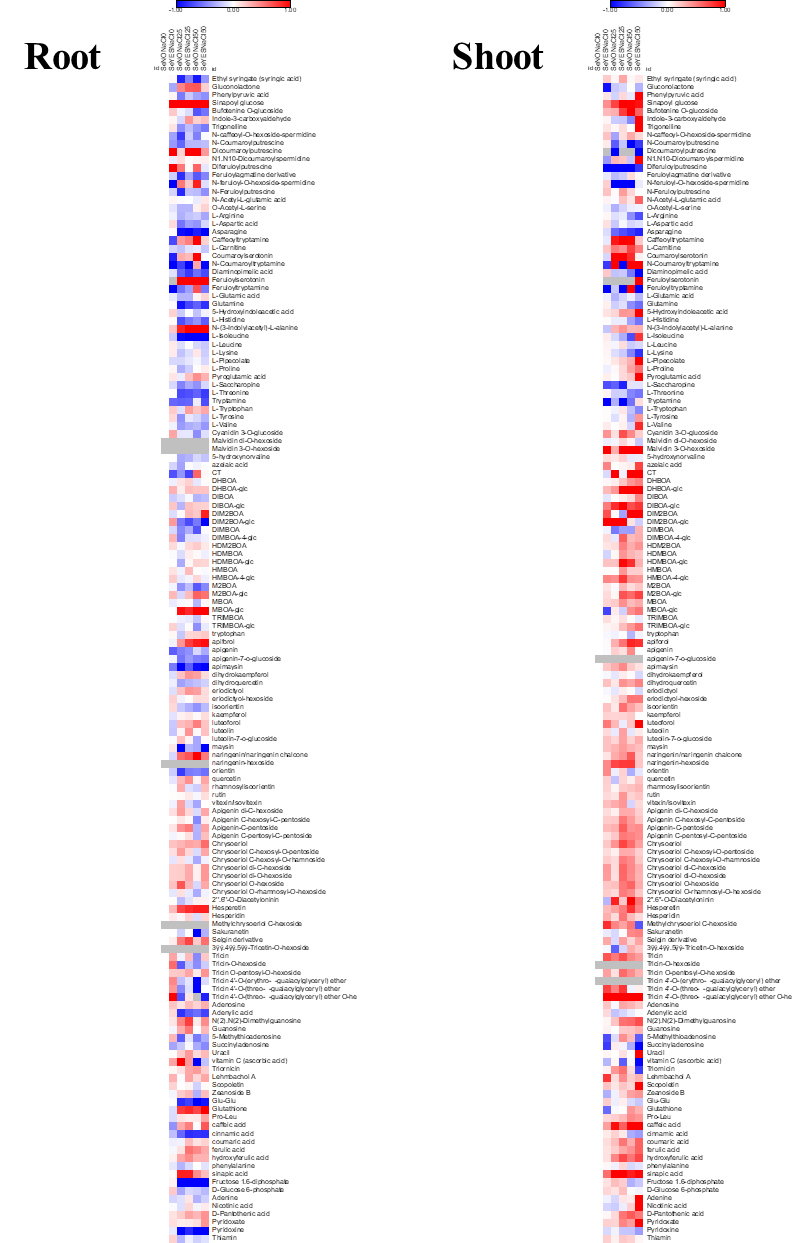


**Figure S2:** Heatmap visualization of semipolar metabolomes. Data are reported as log2 fold with respect to SeNONaCl0 treatment.

**Table S1:** LC-HRMS analysis of the non-polar metabolome in maize sprouts obtained at 0, 25, or 50 mM NaCl (i.e., NaCl0, NaCl25, and NaCl50, respectively) from grains produced without or with Se fertilization (i.e., SeNO and SeYES, respectively). Data are represented as the mean (standard deviation) of two independent biological replicates, with three separate measurements per replicate. Asterisks indicate significant differences according to a t-test (pValue: *<0.05; **<0.01) carried out by comparing each treatment against the control treatment SeNONaCl0. Red and green boxes refer to metabolites showing a higher and lower content compared to SeNONaCl0, respectively.

**Table S2.** LC-HRMS analysis of semipolar metabolome in maize sprouts obtained at 0, 25, or 50 mM NaCl (i.e., NaCl0, NaCl25, and NaCl50, respectively) from grains produced without or with Se fertilization (i.e., SeNO and SeYES, respectively). Data are represented as the mean (standard deviation) of two independent biological replicates, with three separate measurements per replicate. Asterisks indicate significant differences according to a t-test (*p*-Value: *<0.05; **<0.01) carried out by comparing each treatment against the control treatment SeNONaCl0. Red and green boxes refer to metabolites showing a higher and lower content compared to SeNONaCl0, respectively.
